# Supplementary material
Source: PubMed Central journal article supplement (PMC6430652)
Supplement: NIHMS1518152-supplement-1.pdf [file NIHMS1518152-supplement-1.pdf]

## Supplemental Tables & Figures

Table S1. Components of the Mediterranean-style Diet Score (MDS) and Alternative Healthy Eating Index (AHEI)

|                          | MDS | AHEI |
|--------------------------|-----|------|
| Maximum score            | 25  | 110  |
| Vegetables               | +   | +    |
| Fruits                   | +   | +    |
| Nuts                     | +   |      |
| Legumes                  | +   |      |
| Nuts and Legumes         |     | +    |
| Whole grains             | +   | +    |
| Fish                     | +   |      |
| Red meat                 | -   | -    |
| MUFA/SFA ratio           | +   |      |
| Alcohol                  | +   | +    |
| SSB and fruit juice      |     | -    |
| EPA and DHA              |     | +    |
| PUFA without EPA and DHA |     | +    |
| Trans-fatty acids        |     | -    |
| Sodium                   |     | -    |

+ items: Greater consumption increased the dietary score

- items: Greater consumption decreased the dietary score

MUFA/SFA ratio=ratio of monounsaturated fatty acids to saturated fatty acids. SSB=sugar-sweetened beverages.

EPA=Eicosapentaenoic acid. DHA=Docosahexaenoic acid.

PUFA=Poly-unsaturated fatty acids

Table S2. Genetic variants included in each ectopic fat GRS.

| SNP        | CHR | Position  | Effect Allele | Other Allele | Effect Allele Frequency | Imputation Quality |
|------------|-----|-----------|---------------|--------------|-------------------------|--------------------|
| VAT GRS    |     |           |               |              |                         |                    |
| rs10060123 | 5   | 125683910 | C             | A            | 0.74                    | 0.99               |
| rs2842895  | 6   | 7106316   | G             | C            | 0.44                    | 0.92               |
| SAT GRS    |     |           |               |              |                         |                    |
| rs2123685  | 17  | 38053889  | T             | C            | 0.97                    | 1.00               |
| rs7185735  | 16  | 53822651  | A             | G            | 0.59                    | 0.98               |
| rs2237199  | 6   | 16430021  | G             | A            | 0.89                    | 0.94               |
| VSR GRS    |     |           |               |              |                         |                    |
| rs7374732  | 3   | 23203454  | T             | C            | 0.64                    | 1.00               |
| rs6689335  | 1   | 219628682 | T             | C            | 0.56                    | 0.93               |
| rs912056   | 6   | 6736197   | T             | A            | 0.62                    | 0.96               |
| PAT GRS    |     |           |               |              |                         |                    |
| rs6587515  | 1   | 150608888 | G             | A            | 0.91                    | 0.97               |
| rs10198628 | 2   | 12964497  | G             | A            | 0.53                    | 1.00               |
| rs2434264  | 5   | 158022203 | T             | G            | 0.65                    | 1.00               |
| rs1650505  | 5   | 158029734 | G             | A            | 0.79                    | 0.98               |

Genetic variants are taken from previously published genome-wide association study meta-analysis. VAT=Visceral Adipose Tissue. SAT=Subcutaneous Adipose Tissue. VSR=Visceral to Subcutaneous Adipose Tissue Ratio. PAT=Pericardial Adipose Tissue. GRS=Genetic Risk Score. SNP=Single Nucleotide Polymorphism. CHR=Chromosome.

Table S3. Genetic variants included in the BMI GRS.

| SNP        | CHR | Position  | Effect Allele | Other Allele | Effect Allele Frequency | Imputation Quality |
|------------|-----|-----------|---------------|--------------|-------------------------|--------------------|
| rs2820292  | 1   | 201784287 | A             | C            | 0.45                    | 0.90               |
| rs17024393 | 1   | 110154688 | T             | C            | 0.97                    | 0.91               |
| rs3101336  | 1   | 72751185  | C             | T            | 0.63                    | 0.91               |
| rs12401738 | 1   | 78446761  | G             | A            | 0.68                    | 0.92               |
| rs657452   | 1   | 49589847  | A             | G            | 0.38                    | 0.93               |
| rs977747   | 1   | 47684677  | T             | G            | 0.40                    | 0.99               |
| rs11165643 | 1   | 96924097  | T             | C            | 0.57                    | 0.99               |
| rs11583200 | 1   | 50559820  | C             | T            | 0.37                    | 0.99               |
| rs543874   | 1   | 177889480 | A             | G            | 0.82                    | 0.99               |
| rs12566985 | 1   | 75002193  | G             | A            | 0.44                    | 1.00               |
| rs17203016 | 2   | 208255518 | A             | G            | 0.82                    | 0.89               |
| rs2121279  | 2   | 143043285 | C             | T            | 0.88                    | 0.92               |
| rs1016287  | 2   | 59305625  | C             | T            | 0.69                    | 0.96               |
| rs1528435  | 2   | 181550962 | T             | C            | 0.63                    | 0.96               |
| rs1460676  | 2   | 164567689 | T             | C            | 0.83                    | 0.97               |
| rs11688816 | 2   | 63053048  | G             | A            | 0.49                    | 0.97               |
| rs492400   | 2   | 219349752 | T             | C            | 0.58                    | 0.98               |
| rs7599312  | 2   | 213413231 | G             | A            | 0.75                    | 1.00               |
| rs11126666 | 2   | 26928811  | G             | A            | 0.75                    | 1.00               |
| rs2176040  | 2   | 227092802 | G             | A            | 0.63                    | 1.00               |
| rs10182181 | 2   | 25150296  | G             | A            | 0.48                    | 1.00               |
| rs13021737 | 2   | 632348    | G             | A            | 0.82                    | 1.00               |
| rs6804842  | 3   | 25106437  | G             | A            | 0.56                    | 0.95               |
| rs13078960 | 3   | 85807590  | T             | G            | 0.79                    | 0.96               |
| rs16851483 | 3   | 141275436 | G             | T            | 0.94                    | 0.96               |
| rs2365389  | 3   | 61236462  | T             | C            | 0.39                    | 0.97               |
| rs1516725  | 3   | 185824004 | C             | T            | 0.85                    | 0.98               |
| rs3849570  | 3   | 81792112  | C             | A            | 0.67                    | 0.99               |
| rs11727676 | 4   | 145659064 | T             | C            | 0.92                    | 0.32               |
| rs10938397 | 4   | 45182527  | A             | G            | 0.59                    | 0.78               |
| rs13107325 | 4   | 103188709 | C             | T            | 0.92                    | 0.98               |
| rs17001654 | 4   | 77129568  | C             | G            | 0.83                    | 0.99               |
| rs2112347  | 5   | 75015242  | T             | G            | 0.63                    | 0.96               |
| rs7715256  | 5   | 153537893 | G             | T            | 0.44                    | 0.98               |
| rs2033529  | 6   | 40348653  | A             | G            | 0.72                    | 0.94               |
| rs13201877 | 6   | 137675541 | A             | G            | 0.88                    | 0.97               |
| rs9400239  | 6   | 108977663 | C             | T            | 0.67                    | 0.98               |
| rs205262   | 6   | 34563164  | A             | G            | 0.71                    | 0.98               |
| rs9374842  | 6   | 120185665 | T             | C            | 0.76                    | 0.99               |
| rs13191362 | 6   | 163033350 | A             | G            | 0.88                    | 1.00               |
| rs2207139  | 6   | 50845490  | A             | G            | 0.83                    | 1.00               |

Table S3 continued.

| SNP        | CHR | Position  | Effect Allele | Other Allele | Effect Allele Frequency | Imputation Quality |
|------------|-----|-----------|---------------|--------------|-------------------------|--------------------|
| rs2245368  | 7   | 76608143  | T             | C            | 0.80                    | 0.89               |
| rs6465468  | 7   | 95169514  | G             | T            | 0.72                    | 0.90               |
| rs9641123  | 7   | 93197732  | G             | C            | 0.60                    | 0.94               |
| rs16907751 | 8   | 81375457  | C             | T            | 0.90                    | 0.68               |
| rs2033732  | 8   | 85079709  | C             | T            | 0.76                    | 0.95               |
| rs17405819 | 8   | 76806584  | T             | C            | 0.71                    | 1.00               |
| rs10733682 | 9   | 129460914 | A             | G            | 0.46                    | 0.68               |
| rs10968576 | 9   | 28414339  | A             | G            | 0.71                    | 0.99               |
| rs4740619  | 9   | 15634326  | C             | T            | 0.47                    | 0.99               |
| rs6477694  | 9   | 111932342 | T             | C            | 0.66                    | 1.00               |
| rs1928295  | 9   | 120378483 | T             | C            | 0.56                    | 1.00               |
| rs7903146  | 10  | 114758349 | C             | T            | 0.69                    | 0.94               |
| rs11191560 | 10  | 104869038 | T             | C            | 0.91                    | 0.98               |
| rs17094222 | 10  | 102395440 | T             | C            | 0.76                    | 0.99               |
| rs7899106  | 10  | 87410904  | A             | G            | 0.96                    | 1.00               |
| rs2176598  | 11  | 43864278  | C             | T            | 0.73                    | 0.99               |
| rs4256980  | 11  | 8673939   | G             | C            | 0.64                    | 0.99               |
| rs12286929 | 11  | 115022404 | A             | G            | 0.49                    | 1.00               |
| rs11030104 | 11  | 27684517  | A             | G            | 0.79                    | 1.00               |
| rs3817334  | 11  | 47650993  | C             | T            | 0.59                    | 1.00               |
| rs7138803  | 12  | 50247468  | G             | A            | 0.64                    | 0.92               |
| rs12429545 | 13  | 54102206  | G             | A            | 0.87                    | 0.50               |
| rs1441264  | 13  | 79580919  | A             | G            | 0.60                    | 0.89               |
| rs12016871 | 13  | 28017782  | C             | T            | 0.83                    | 0.95               |
| rs9540493  | 13  | 66205704  | A             | G            | 0.44                    | 1.00               |
| rs11847697 | 14  | 30515112  | C             | T            | 0.95                    | 0.76               |
| rs10132280 | 14  | 25928179  | C             | A            | 0.69                    | 0.91               |
| rs7141420  | 14  | 79899454  | T             | C            | 0.52                    | 1.00               |
| rs12885454 | 14  | 29736838  | C             | A            | 0.67                    | 1.00               |
| rs3736485  | 15  | 51748610  | A             | G            | 0.51                    | 0.91               |
| rs7164727  | 15  | 73093991  | C             | T            | 0.33                    | 0.98               |
| rs16951275 | 15  | 68077168  | T             | C            | 0.78                    | 1.00               |
| rs758747   | 16  | 3627358   | C             | T            | 0.70                    | 0.60               |
| rs2080454  | 16  | 49062590  | A             | C            | 0.62                    | 0.66               |
| rs4787491  | 16  | 30015337  | A             | G            | 0.49                    | 0.77               |
| rs9925964  | 16  | 31129895  | A             | G            | 0.61                    | 0.83               |
| rs12446632 | 16  | 19935389  | G             | A            | 0.85                    | 0.99               |
| rs2650492  | 16  | 28333411  | G             | A            | 0.74                    | 0.99               |
| rs1558902  | 16  | 53803574  | T             | A            | 0.58                    | 1.00               |
| rs1000940  | 17  | 5283252   | A             | G            | 0.70                    | 0.98               |
| rs12940622 | 17  | 78615571  | G             | A            | 0.56                    | 1.00               |
| rs9914578  | 17  | 2005136   | C             | G            | 0.81                    | 1.00               |

Table S3 continued.

| SNP        | CHR | Position | Effect Allele | Other Allele | Effect Allele Frequency | Imputation Quality |
|------------|-----|----------|---------------|--------------|-------------------------|--------------------|
| rs7243357  | 18  | 56883319 | T             | G            | 0.82                    | 0.95               |
| rs1808579  | 18  | 21104888 | T             | C            | 0.47                    | 0.96               |
| rs6567160  | 18  | 57829135 | T             | C            | 0.78                    | 0.97               |
| rs7239883  | 18  | 40147671 | A             | G            | 0.60                    | 1.00               |
| rs3810291  | 19  | 47569003 | G             | A            | 0.38                    | 0.49               |
| rs2287019  | 19  | 46202172 | C             | T            | 0.82                    | 0.78               |
| rs29941    | 19  | 34309532 | G             | A            | 0.67                    | 0.93               |
| rs17724992 | 19  | 18454825 | A             | G            | 0.72                    | 0.95               |
| rs6091540  | 20  | 51087862 | C             | T            | 0.70                    | 1.00               |
| rs2836754  | 21  | 40291740 | T             | C            | 0.38                    | 1.00               |

Genetic variants are taken from previously published genome-wide association study meta-analysis. BMI=Body Mass Index. GRS=Genetic Risk Score. SNP=Single Nucleotide Polymorphism. CHR=Chromosome.

Table S4. Genetic variants included in the WHR GRS.

| SNP        | CHR | Position  | Effect Allele | Other Allele | Effect Allele Frequency | Imputation Quality |
|------------|-----|-----------|---------------|--------------|-------------------------|--------------------|
| rs10919388 | 1   | 170372503 | C             | A            | 0.71                    | 0.99               |
| rs2645294  | 1   | 119574587 | T             | C            | 0.55                    | 1.00               |
| rs2820443  | 1   | 219753509 | T             | C            | 0.71                    | 0.99               |
| rs714515   | 1   | 172352990 | A             | G            | 0.57                    | 1.00               |
| rs905938   | 1   | 154991389 | T             | C            | 0.74                    | 0.79               |
| rs10195252 | 2   | 165513091 | T             | C            | 0.61                    | 0.98               |
| rs1385167  | 2   | 66200648  | A             | G            | 0.88                    | 1.00               |
| rs1569135  | 2   | 188115398 | A             | G            | 0.54                    | 0.97               |
| rs10804591 | 3   | 129334233 | A             | C            | 0.78                    | 0.97               |
| rs17451107 | 3   | 156797609 | T             | C            | 0.58                    | 0.65               |
| rs17819328 | 3   | 12489342  | T             | G            | 0.59                    | 0.88               |
| rs2276824  | 3   | 52637486  | G             | C            | 0.56                    | 0.81               |
| rs2371767  | 3   | 64718258  | G             | C            | 0.69                    | 0.97               |
| rs303084   | 4   | 124066948 | A             | G            | 0.77                    | 0.98               |
| rs3805389  | 4   | 56482750  | G             | A            | 0.76                    | 0.99               |
| rs9991328  | 4   | 89713121  | T             | C            | 0.49                    | 0.96               |
| rs1045241  | 5   | 118729286 | C             | T            | 0.74                    | 1.00               |
| rs6556301  | 5   | 176527577 | G             | T            | 0.63                    | 0.39               |
| rs7705502  | 5   | 173320815 | G             | A            | 0.72                    | 0.99               |
| rs9687846  | 5   | 55861894  | G             | A            | 0.79                    | 0.96               |
| rs1294410  | 6   | 6738752   | C             | T            | 0.61                    | 0.96               |
| rs1358980  | 6   | 43764551  | C             | T            | 0.52                    | 0.69               |
| rs1776897  | 6   | 34195011  | T             | G            | 0.91                    | 0.98               |
| rs1936805  | 6   | 127452116 | T             | C            | 0.49                    | 1.00               |
| rs10245353 | 7   | 25858614  | C             | A            | 0.81                    | 0.97               |
| rs1534696  | 7   | 26397239  | A             | C            | 0.56                    | 0.97               |
| rs7801581  | 7   | 27223771  | C             | T            | 0.76                    | 0.91               |
| rs12679556 | 8   | 72514228  | G             | T            | 0.27                    | 1.00               |
| rs7830933  | 8   | 23603324  | A             | G            | 0.75                    | 0.91               |
| rs10991437 | 9   | 107735920 | C             | A            | 0.89                    | 1.00               |
| rs7917772  | 10  | 104487443 | A             | G            | 0.63                    | 0.91               |
| rs11231693 | 11  | 63862612  | G             | A            | 0.94                    | 0.99               |
| rs10842707 | 12  | 26471364  | C             | T            | 0.80                    | 0.98               |
| rs1443512  | 12  | 54342684  | C             | A            | 0.76                    | 0.99               |
| rs4765219  | 12  | 124440110 | C             | A            | 0.65                    | 1.00               |
| rs1440372  | 15  | 67033151  | C             | T            | 0.73                    | 1.00               |
| rs8030605  | 15  | 56504598  | G             | A            | 0.87                    | 1.00               |
| rs8042543  | 15  | 31708263  | C             | T            | 0.79                    | 0.90               |
| rs2925979  | 16  | 81534790  | C             | T            | 0.70                    | 0.84               |
| rs4646404  | 17  | 17420199  | G             | A            | 0.63                    | 0.75               |
| rs8066985  | 17  | 68453345  | G             | A            | 0.54                    | 0.98               |

Table S4 continued.

| SNP        | CHR | Position | Effect Allele | Other Allele | Effect Allele Frequency | Imputation Quality |
|------------|-----|----------|---------------|--------------|-------------------------|--------------------|
| rs12608504 | 19  | 18389135 | G             | A            | 0.63                    | 0.96               |
| rs4081724  | 19  | 33824946 | G             | A            | 0.85                    | 0.82               |
| rs224333   | 20  | 34023962 | G             | A            | 0.61                    | 0.89               |
| rs6090583  | 20  | 45558831 | A             | G            | 0.49                    | 1.00               |
| rs979012   | 20  | 6623374  | C             | T            | 0.64                    | 0.82               |
| rs2294239  | 22  | 29449477 | A             | G            | 0.57                    | 0.94               |

WHR adjusted for BMI. Genetic variants are taken from previously published genome-wide association study meta-analysis. WHR=Waist to Hip Ratio. BMI=Body Mass Index. GRS=Genetic Risk Score. SNP=Single Nucleotide Polymorphism. CHR=Chromosome.

Table S5. Intakes of dietary components of the MDS according quartile categories of  $\Delta$ MDS

|                     |            | $\Delta$ MDS  |               |               |               |
|---------------------|------------|---------------|---------------|---------------|---------------|
|                     |            | Q1            | Q2            | Q3            | Q4            |
| Median $\Delta$ MDS |            | -4            | -1            | 1             | 5             |
|                     |            | Baseline      |               |               |               |
| MDS                 |            | 15 $\pm$ 4    | 13 $\pm$ 4    | 12 $\pm$ 4    | 10 $\pm$ 4    |
| Vegetable           | servings/d | 2.8 $\pm$ 1.8 | 2.6 $\pm$ 1.8 | 2.4 $\pm$ 1.6 | 2.2 $\pm$ 1.5 |
| Fruit               | servings/d | 2.4 $\pm$ 1.4 | 2.2 $\pm$ 1.6 | 1.9 $\pm$ 1.4 | 1.9 $\pm$ 1.4 |
| Nut                 | servings/d | 0.5 $\pm$ 0.6 | 0.4 $\pm$ 0.6 | 0.3 $\pm$ 0.4 | 0.3 $\pm$ 0.4 |
| Whole grain         | servings/d | 1.2 $\pm$ 1.0 | 1.1 $\pm$ 1.1 | 0.9 $\pm$ 1.0 | 0.8 $\pm$ 0.9 |
| Legume              | servings/d | 0.5 $\pm$ 0.4 | 0.4 $\pm$ 0.4 | 0.3 $\pm$ 0.3 | 0.3 $\pm$ 0.3 |
| Fish                | servings/d | 0.4 $\pm$ 0.3 | 0.3 $\pm$ 0.3 | 0.3 $\pm$ 0.2 | 0.3 $\pm$ 0.2 |
| Red meat            | servings/d | 0.8 $\pm$ 0.6 | 0.8 $\pm$ 0.5 | 0.8 $\pm$ 0.6 | 0.8 $\pm$ 0.6 |
| MUFA/SAT ratio      |            | 1.1 $\pm$ 0.2 | 1.1 $\pm$ 0.2 | 1.0 $\pm$ 0.2 | 1.0 $\pm$ 0.2 |
| Alcohol             | g/d        | 10 $\pm$ 14   | 11 $\pm$ 15   | 10 $\pm$ 12   | 11 $\pm$ 14   |
|                     |            | Follow-up     |               |               |               |
| MDS                 |            | 10 $\pm$ 4    | 12 $\pm$ 4    | 13 $\pm$ 4    | 16 $\pm$ 4    |
| Vegetable           | servings/d | 2.3 $\pm$ 1.9 | 2.7 $\pm$ 1.7 | 2.9 $\pm$ 1.9 | 3.4 $\pm$ 2.1 |
| Fruit               | servings/d | 1.6 $\pm$ 1.2 | 1.9 $\pm$ 1.4 | 1.9 $\pm$ 1.3 | 2.3 $\pm$ 1.5 |
| Nut                 | servings/d | 0.5 $\pm$ 0.7 | 0.6 $\pm$ 0.8 | 0.7 $\pm$ 0.8 | 0.9 $\pm$ 0.9 |
| Whole grain         | servings/d | 0.9 $\pm$ 1.1 | 1.0 $\pm$ 0.9 | 1.2 $\pm$ 1.1 | 1.4 $\pm$ 1.1 |
| Legume              | servings/d | 0.3 $\pm$ 0.4 | 0.4 $\pm$ 0.4 | 0.4 $\pm$ 0.3 | 0.5 $\pm$ 0.5 |
| Fish                | servings/d | 0.2 $\pm$ 0.2 | 0.3 $\pm$ 0.3 | 0.3 $\pm$ 0.3 | 0.4 $\pm$ 0.3 |
| Red meat            | servings/d | 0.9 $\pm$ 0.6 | 0.8 $\pm$ 0.6 | 0.8 $\pm$ 0.5 | 0.7 $\pm$ 0.6 |
| MUFA/SAT ratio      |            | 1.1 $\pm$ 0.3 | 1.2 $\pm$ 0.3 | 1.2 $\pm$ 0.3 | 1.3 $\pm$ 0.3 |
| Alcohol             | g/d        | 10 $\pm$ 15   | 12 $\pm$ 16   | 11 $\pm$ 14   | 11 $\pm$ 14   |

Values are mean and standard deviation.

MUFA/SFA ratio=ratio of monounsaturated fatty acids to saturated fatty acids.

MDS=Mediterranean-style Dietary Score.



Table S6. Associations between change in AHEI and change in ectopic fat depots.

|                                       | Quartile $\Delta$ AHEI |                   |                   |                   | Per SD Increase in $\Delta$ AHEI | Sex-interaction of $\Delta$ AHEI |               |
|---------------------------------------|------------------------|-------------------|-------------------|-------------------|----------------------------------|----------------------------------|---------------|
|                                       | Q1                     | Q2                | Q3                | Q4                |                                  | P-value                          | P-interaction |
| Median $\Delta$ AHEI                  | -6                     | 2                 | 9                 | 18                |                                  |                                  |               |
| Change in VAT volume, cm <sup>3</sup> |                        |                   |                   |                   |                                  |                                  |               |
| Model 1                               | 699 (632, 766)         | 630 (565, 695)    | 665 (600, 730)    | 573 (506, 640)    | -47 (-81, -13)                   | 0.007                            | 0.01          |
| Model 2                               | 699 (632, 766)         | 633 (567, 698)    | 667 (602, 732)    | 571 (504, 638)    | -45 (-79, -11)                   | 0.01                             | 0.01          |
| Change in SAT volume, cm <sup>3</sup> |                        |                   |                   |                   |                                  |                                  |               |
| Model 1                               | 572 (500, 644)         | 529 (459, 599)    | 544 (474, 613)    | 421 (350, 492)    | -59 (-96, -21)                   | 0.002                            | 0.15          |
| Model 2                               | 568 (496, 640)         | 535 (465, 605)    | 543 (473, 612)    | 420 (349, 492)    | -58 (-95, -20)                   | 0.003                            | 0.16          |
| Change in VSR                         |                        |                   |                   |                   |                                  |                                  |               |
| Model 1                               | 0.11 (0.09, 0.13)      | 0.10 (0.08, 0.12) | 0.09 (0.08, 0.11) | 0.09 (0.07, 0.11) | -0.01 (-0.02, 0.00)              | 0.03                             | 0.05          |
| Model 2                               | 0.11 (0.09, 0.13)      | 0.10 (0.08, 0.11) | 0.09 (0.08, 0.11) | 0.09 (0.07, 0.11) | -0.01 (-0.02, 0.00)              | 0.06                             | 0.02          |
| Change in PAT volume, cm <sup>3</sup> |                        |                   |                   |                   |                                  |                                  |               |
| Model 1                               | 0.6 (-1.5, 3.0)        | -2.2 (-4.2, -0.1) | -2.3 (-4.4, -0.3) | -5.8 (-7.9, -3.7) | -2.3 (-3.4, -1.2)                | <0.001                           | 0.85          |
| Model 2                               | 0.6 (-1.5, 2.7)        | -2.1 (-4.2, 0)    | -2.3 (-4.4, -0.2) | -5.8 (-7.9, -3.7) | -2.3 (-3.4, -1.1)                | <0.001                           | 0.81          |

Values are adjusted mean (95%CI)

Model 1 adjusted for sex, age, baseline adipose tissue (e.g., baseline VAT for  $\Delta$ VAT or baseline VSR for  $\Delta$ VSR), baseline AHEI, baseline energy intake, baseline physical activity, and baseline smoking status; Model 2 adjusted for model 1 covariates plus baseline BMI, change in energy intake, physical activity, and smoking status. In model 2, we also adjusted for baseline SAT in analysis for  $\Delta$ VAT and baseline VAT in analysis for  $\Delta$ SAT.

BMI=Body Mass Index; VAT=Visceral Adipose Tissue; SAT=Subcutaneous Adipose Tissue; VSR=VAT to SAT Ratio; PAT=Pericardial Adipose Tissue; AHEI=Alternative Healthy Eating Index; SD=Standard Deviation

Table S7. Associations between genetic risk scores for BMI and WHR and baseline and change in corresponding ectopic fat volumes in overall sample.

|                                                  | Model 1 |       |         | Model 2 |       |         |
|--------------------------------------------------|---------|-------|---------|---------|-------|---------|
|                                                  | Effect  | SE    | p-value | Effect  | SE    | p-value |
| <i>BMI GRS (per standard deviation increase)</i> |         |       |         |         |       |         |
| Baseline VAT, cm <sup>3</sup>                    | 49      | 21    | 0.02    | 56      | 20    | 0.01    |
| Change in VAT, cm <sup>3</sup>                   | 19      | 17    | 0.26    | 19      | 17    | 0.25    |
| Baseline SAT, cm <sup>3</sup>                    | 165     | 33    | <0.001  | 174     | 32    | <0.001  |
| Change in SAT, cm <sup>3</sup>                   | 11      | 18    | 0.55    | 12      | 18    | 0.51    |
| Baseline VSR                                     | -0.02   | 0.01  | 0.02    | -0.01   | 0.01  | 0.03    |
| Change in VSR                                    | 0.007   | 0.005 | 0.14    | 0.007   | 0.005 | 0.12    |
| Baseline PAT, cm <sup>3</sup>                    | 2       | 1     | 0.06    | 2       | 1     | 0.03    |
| Change in PAT, cm <sup>3</sup>                   | 0       | 1     | 0.68    | 0       | 1     | 0.78    |
| <i>WHR GRS (per standard deviation increase)</i> |         |       |         |         |       |         |
| Baseline VAT, cm <sup>3</sup>                    | 37      | 21    | 0.09    | 55      | 15    | <0.001  |
| Change in VAT, cm <sup>3</sup>                   | -5      | 17    | 0.77    | -5      | 17    | 0.79    |
| Baseline SAT, cm <sup>3</sup>                    | -26     | 34    | 0.45    | 10      | 18    | 0.58    |
| Change in SAT, cm <sup>3</sup>                   | -6      | 19    | 0.73    | -10     | 19    | 0.59    |
| Baseline VSR                                     | 0.02    | 0.01  | 0.002   | 0.02    | 0.01  | 0.002   |
| Change in VSR                                    | 0       | 0.005 | 0.94    | 0       | 0     | 0.85    |
| Baseline PAT, cm <sup>3</sup>                    | 0       | 1     | 0.67    | 1       | 1     | 0.20    |
| Change in PAT, cm <sup>3</sup>                   | 1       | 1     | 0.36    | 0       | 1     | 0.39    |

For the analyses of association between baseline ectopic fat volumes and GRSs, Model 1 adjusted for sex, age, and smoking status and Model 2 additionally adjusted for other genetic components (e.g., in analysis for baseline VAT using BMI GRS, we adjusted for WHR GRS and VAT GRS) and baseline smoking status, physical activity, energy intake, and MDS. The WHR GRS analyses also adjusted for baseline BMI in Model 2. For the analyses of association between change in ectopic fat depot volumes and GRSs, Model 1 adjusted for sex, age, smoking status, and baseline ectopic fat volume and Model 2 additionally adjusted for other genetic components (e.g., in analysis for  $\Delta$ VAT using BMI GRS, we adjusted for WHR GRS and VAT GRS), baseline BMI (only in analysis using WHR GRS), and change in smoking status, physical activity, energy intake, and MDS. VAT=Visceral Adipose Tissue; SAT= Abdominal Subcutaneous Adipose Tissue; VSR=VAT to SAT Ratio; PAT=Pericardial Adipose Tissue; GRS=Genetic Risk Score; MDS=Mediterranean-style Diet Score; BMI=Body Mass Index; SE=Standard Error; WHR=Waist to Hip Ratio.

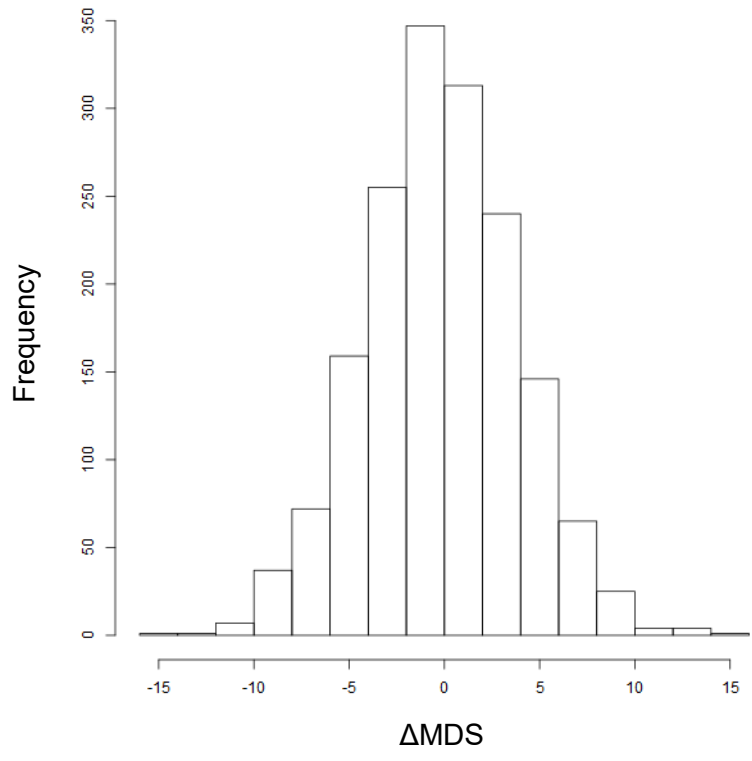

Figure S1. Distribution of ΔMDS (Change in Mediterranean-style diet score).

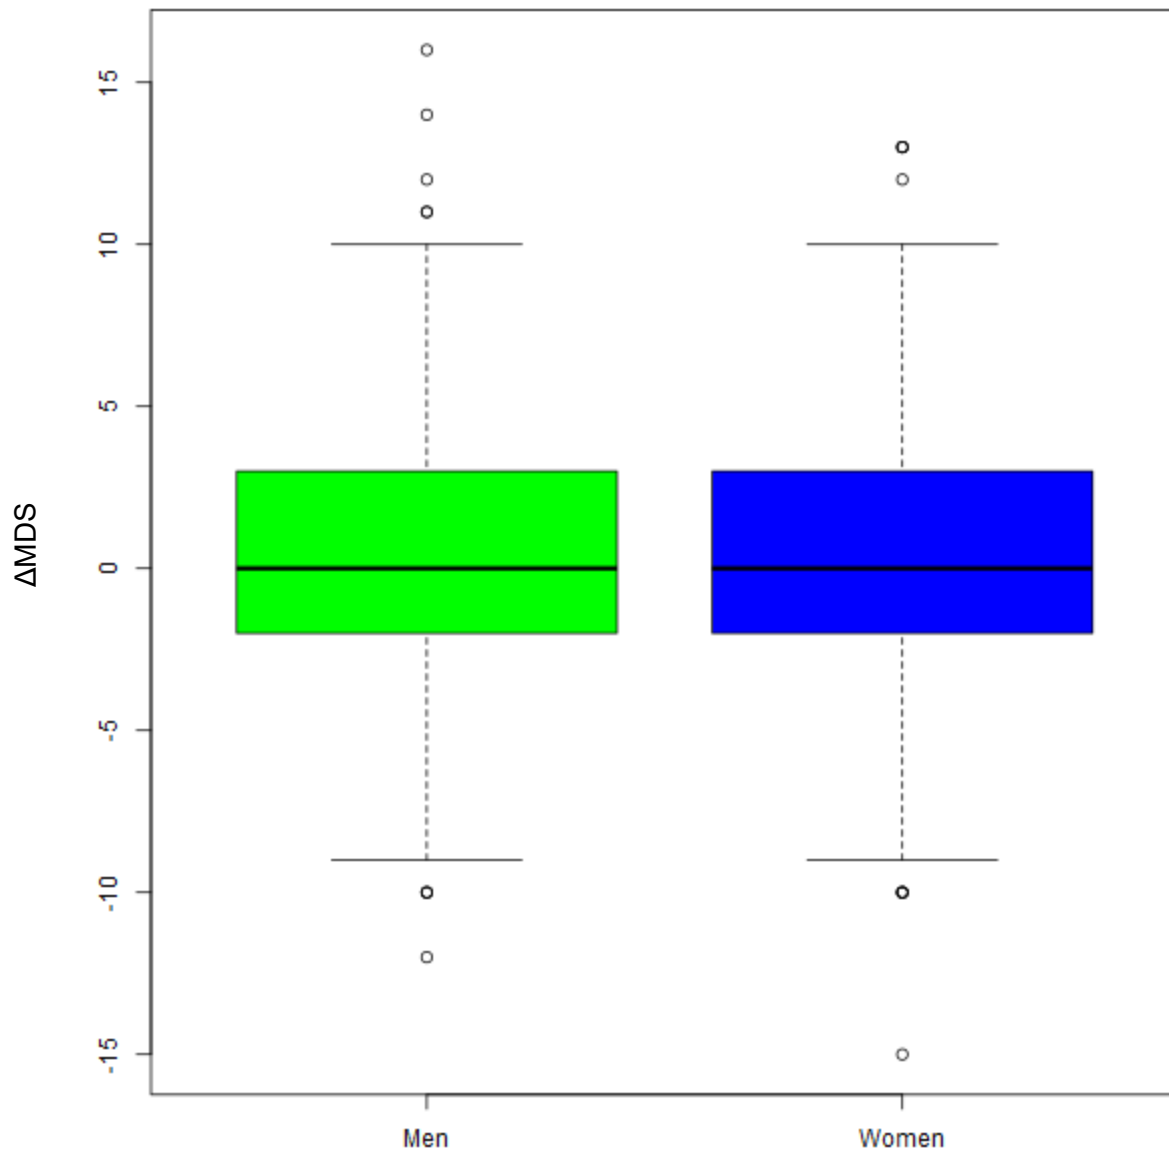

Figure S2. Sex-specific distribution of  $\Delta$ MDS (Change in Mediterranean-style diet score).
